# Supplementary material for: Rational Generation of Monoclonal Antibodies Selective for Pathogenic Forms of Alpha-Synuclein
Source: MDPI journal article supplement (doi:10.3390/biomedicines10092168), 2022-09-02
Supplement: s1 [file s1]

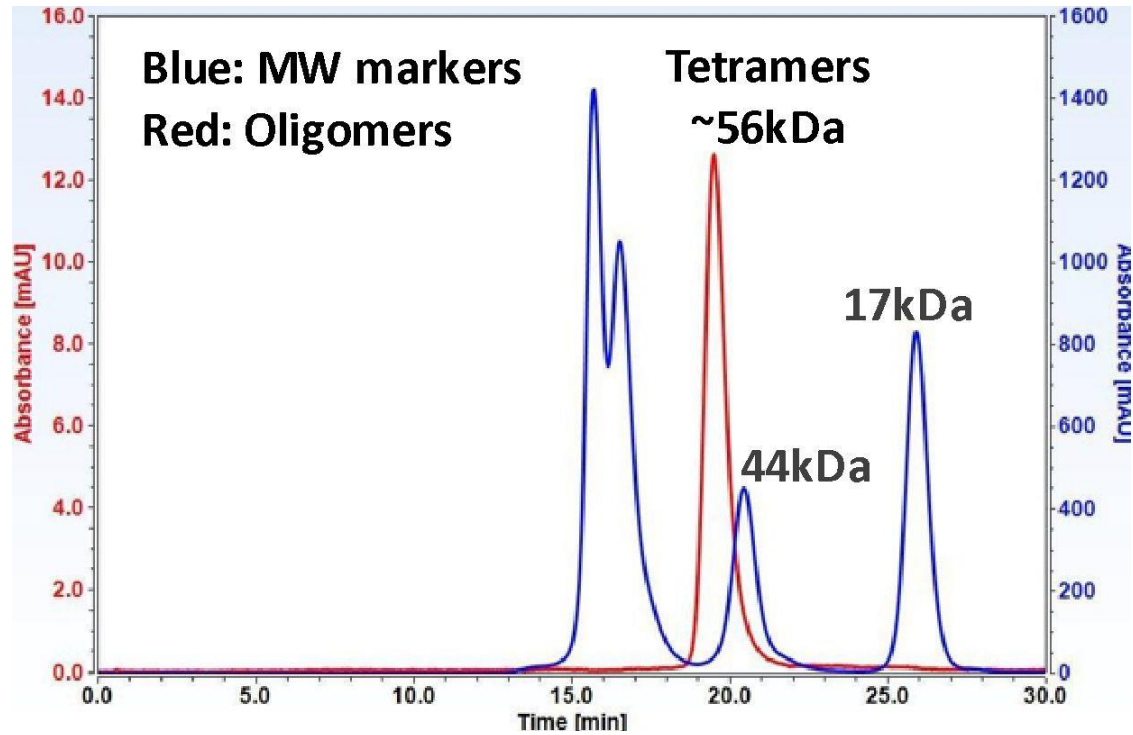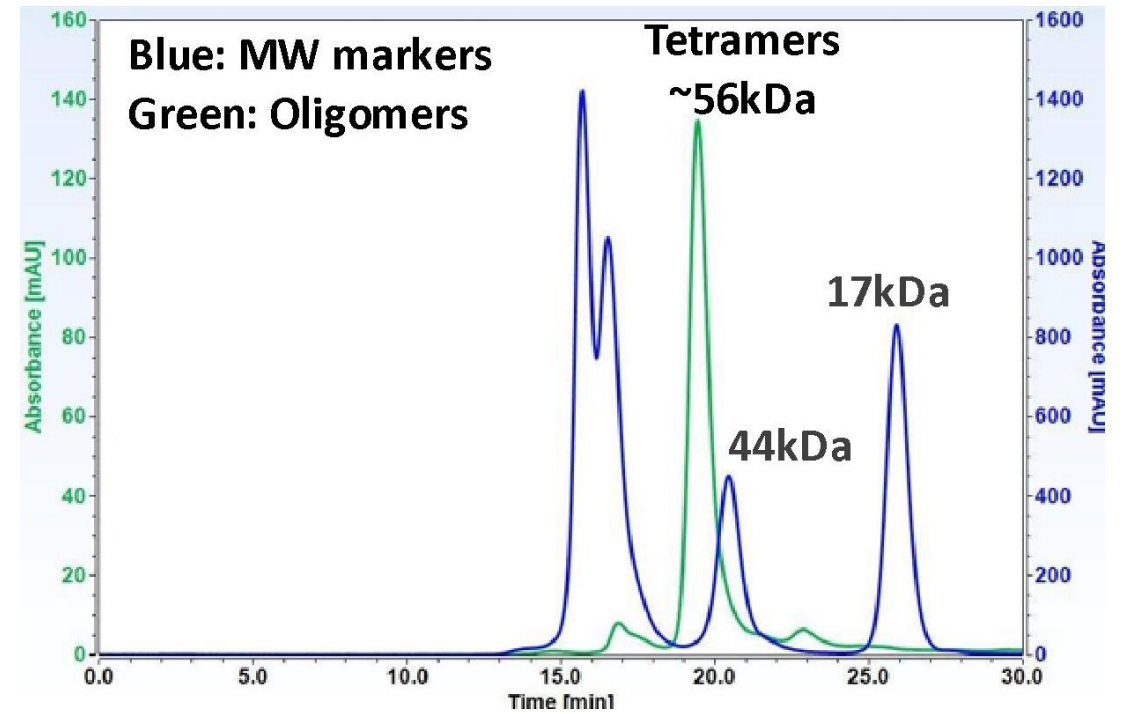

**Supplemental Figure S1.** SEC of oligomer preparations with demonstrated *in vitro* toxicity shows predominance of tetramers.

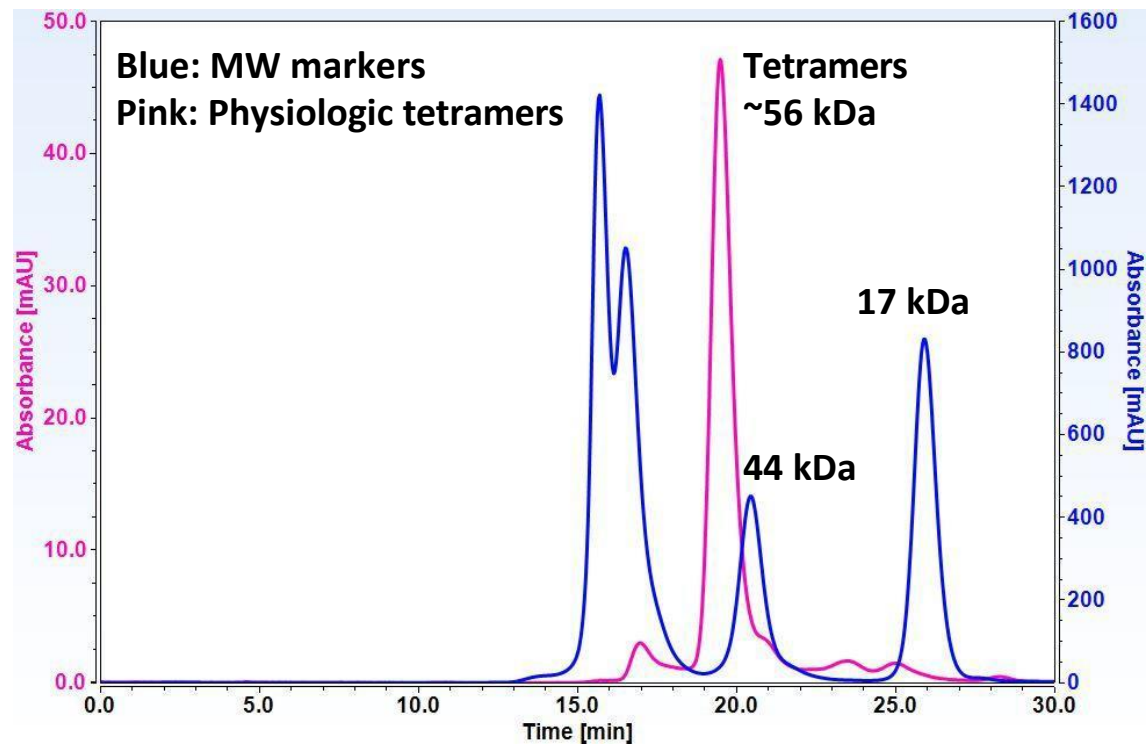

**Supplemental Figure S2.** SEC of physiologic tetramer preparations shows predominance of tetramers.

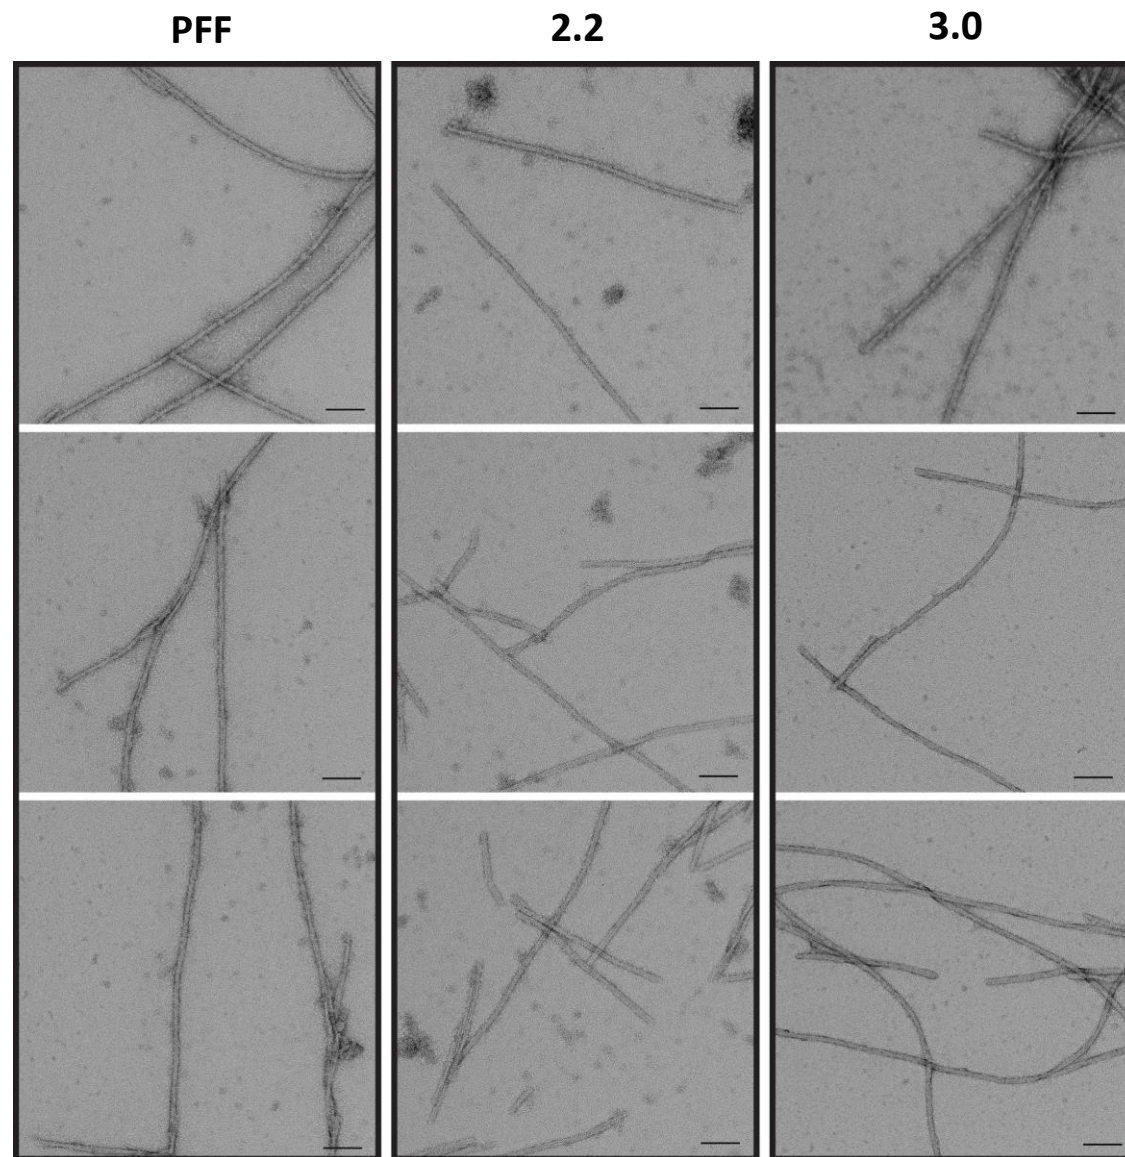

**Supplemental Figure S3.** Electron microscopic analysis of  $\alpha$ -syn fibrils. Representative images of the negative stained fibril specimens acquired at 45,000x using a Ceta CMOS camera on a Talos L120C transmission electron microscope. The overall morphology and widths of the fibrils seeded by peptide scaffolds resemble that of fibrils seeded by PFFs. Scaffold 2.2 = cyclo(CG GK TKEGG), scaffold 3.0 = cyclo(CG GEK TKGGG). Scale bar = 100 nm.
